# Supplementary material for: Much ado about nothing? Off-target amplification can lead to false-positive bacterial brain microbiome detection in healthy and Parkinson’s disease individuals
Source: PubMed Central journal article supplement (PMC8004470; doi:10.1186/s40168-021-01012-1), 2021-03-26

**A**

| Dilution (Mock) | Theoretic log bact. DNA copies | Measured log bact. DNA copies |
|-----------------|--------------------------------|-------------------------------|
| no              | 8.69                           | 8.06                          |
| 1:10            | 7.69                           | 7.54                          |
| 1:100           | 6.69                           | 6.29                          |
| 1:1.000         | 5.69                           | 5.00                          |
| 1:10.000        | 4.69                           | 4.42                          |
| 1:100.000       | 3.69                           | 3.62                          |

**B**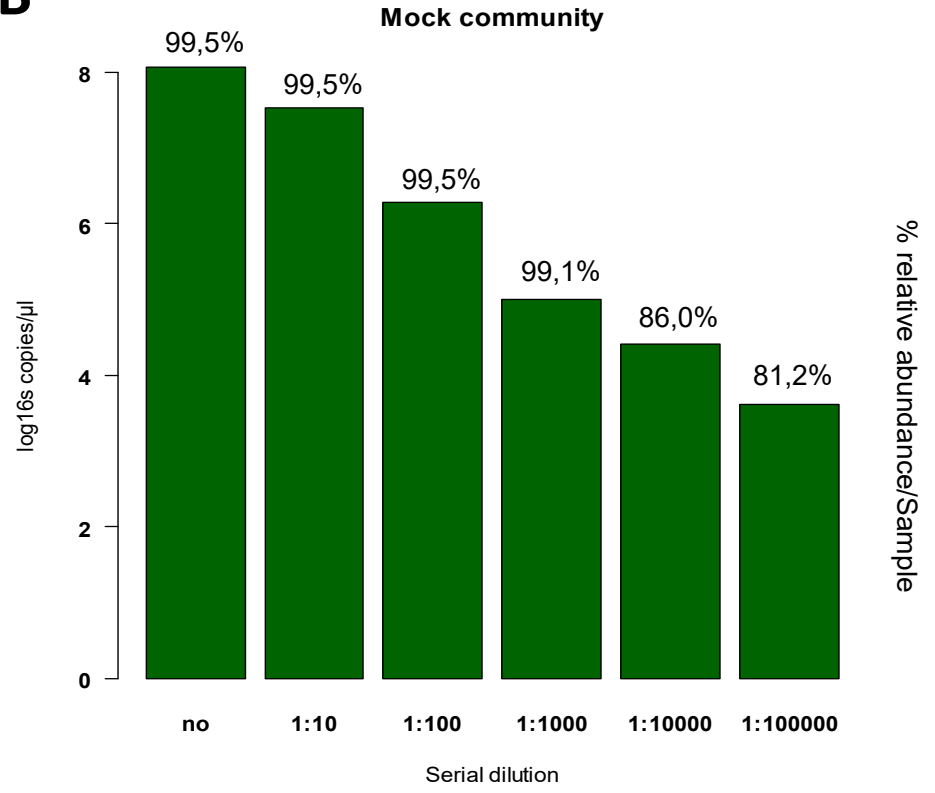**C**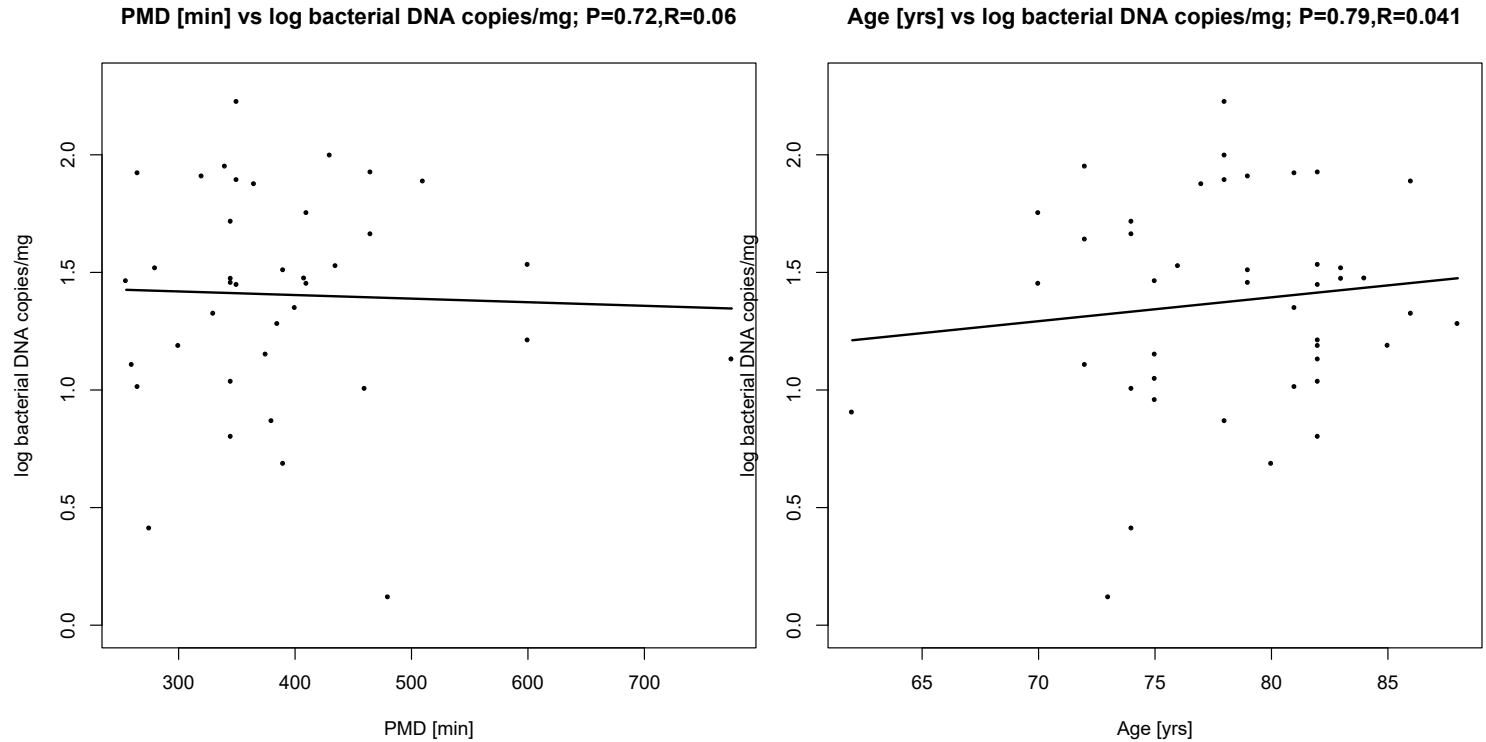

Supplement: 40168_2021_1012_MOESM3_ESM.pdf [file 40168_2021_1012_MOESM3_ESM.pdf]
