# Supplementary material for: Much ado about nothing? Off-target amplification can lead to false-positive bacterial brain microbiome detection in healthy and Parkinson’s disease individuals
Source: PubMed Central journal article supplement (PMC8004470; doi:10.1186/s40168-021-01012-1), 2021-03-26

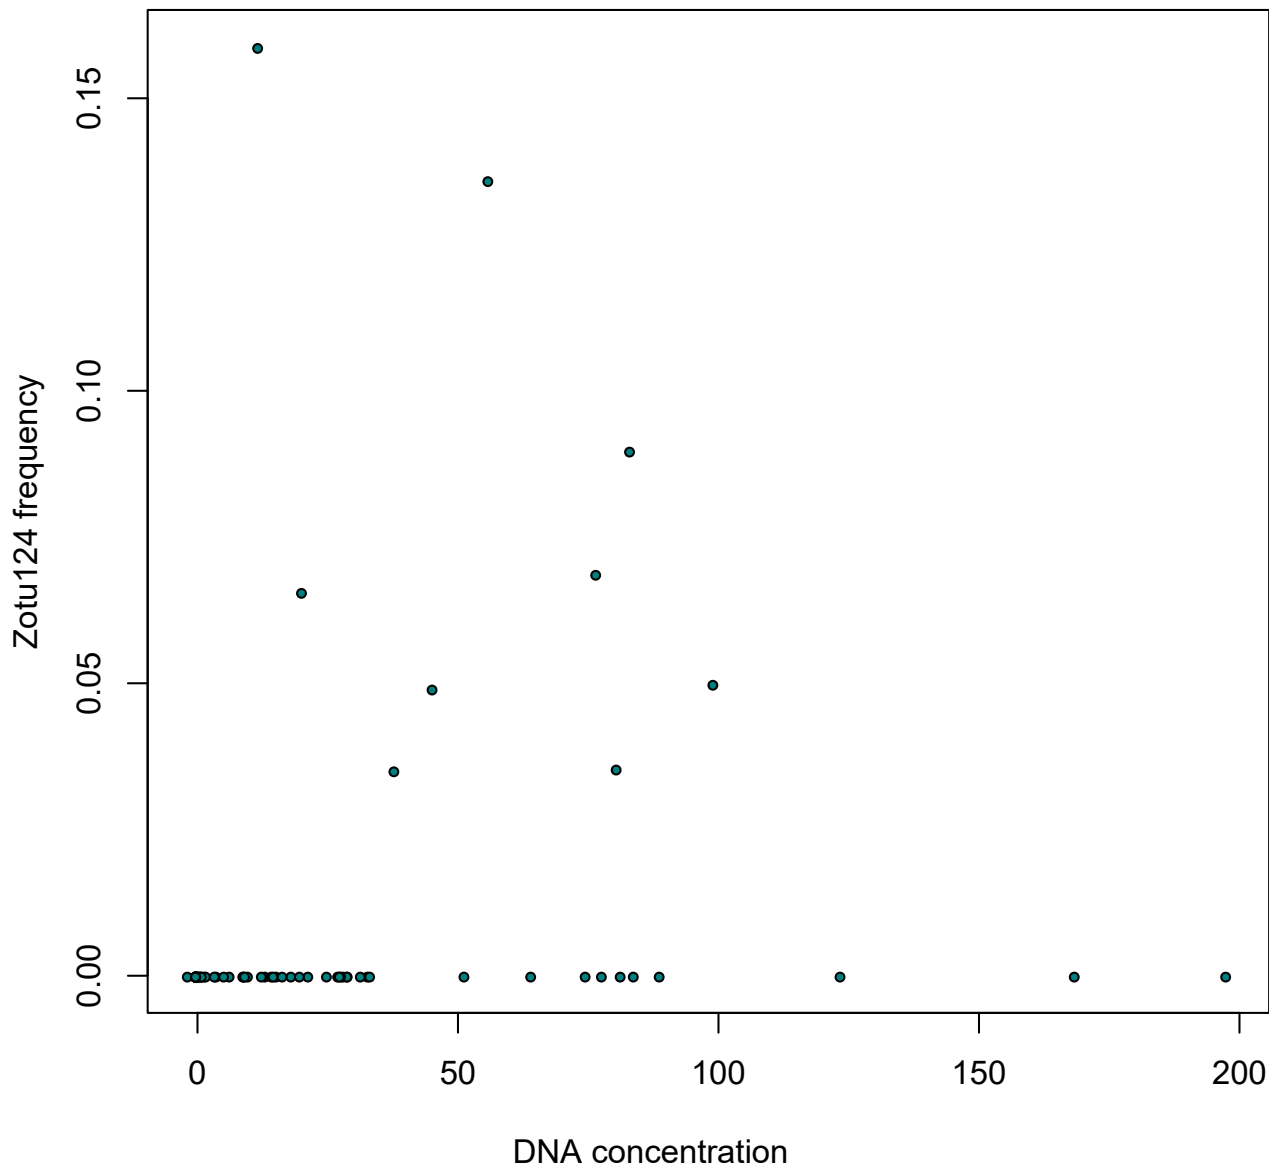

Supplement: 40168_2021_1012_MOESM7_ESM.pdf [file 40168_2021_1012_MOESM7_ESM.pdf]
